# Supplementary material
Source: PubMed Central journal article supplement (PMC3880606)
Supplement: NIHMS535180-supplement-supplement_1.pdf [file NIHMS535180-supplement-supplement_1.pdf]

*Supporting Information for*

**Analysis of Heat-Labile Sites Generated by Reactions of Depleted Uranium  
and Ascorbate in Plasmid DNA**

Janice Wilson, Ashley Young, Edgar R. Civitello, and Diane M. Stearns✉

*Department of Chemistry and Biochemistry, Northern Arizona University, PO Box 5698,  
Flagstaff, AZ 86011-5698*

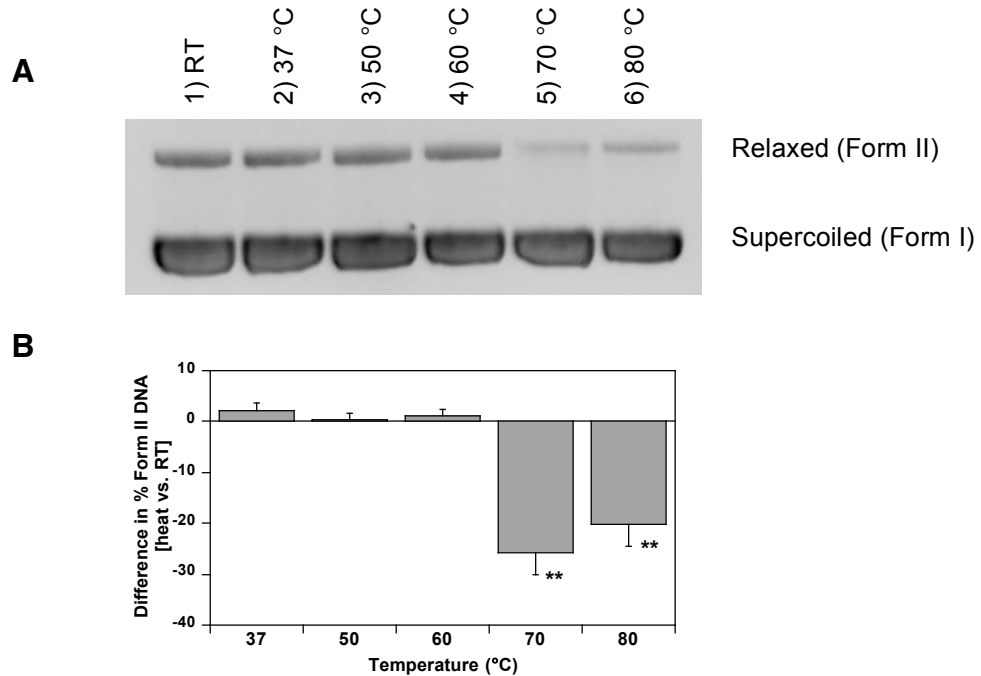

**Figure S1.** Optimization of temperature for post-treatment exposures of pBR322 plasmid DNA (0.2 mM DNA-P in 25 mM ACES, pH 7.4). **(A)** Representative gel illustrating affect of incubation temperature on untreated pBR322 plasmid DNA degradation. DNA was incubated for 30 min at temperatures ranging from RT – 80 °C, followed by gel electrophoresis as described in methods. **(B)** Quantification of DNA degradation as differences in % DNA plasmid relaxation (Form II) for [raised temperature incubation – RT incubations]. Data represent mean  $\pm$  SEM for  $n = 5$  independent experiments. Differences in % Form II DNA for [raised temperature incubation – RT incubation] significantly different than 0 by Student's t-test (\*\* $p < 0.001$ ).

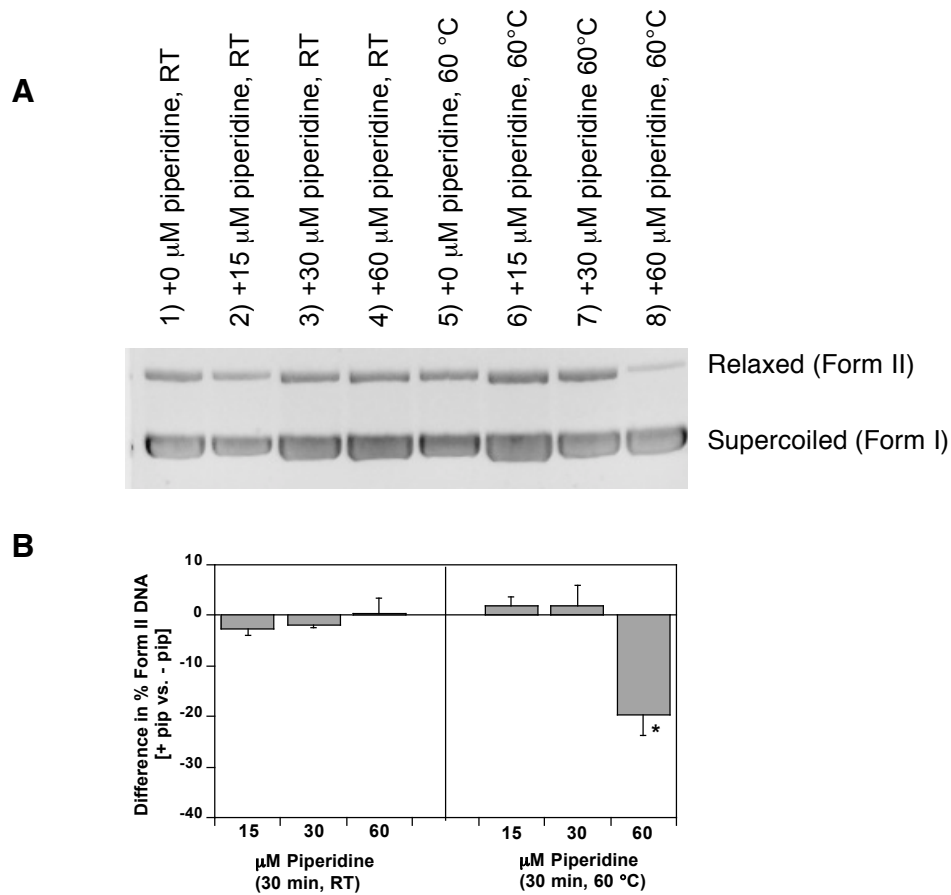

**Figure S2.** Optimization of piperidine concentrations for post-treatment exposures of pBR322 plasmid DNA (0.2 mM DNA-P in 25 mM ACES, pH 7.4). **(A)** Representative gel illustrating affect of piperidine concentration, 0 – 60  $\mu\text{M}$ , on untreated pBR322 plasmid DNA degradation after 30 min incubation at RT (left) or 60 °C (right). **(B)** Quantification of DNA degradation as differences in % DNA plasmid relaxation (Form II) for [piperidine incubation – water incubation]. Data represent mean  $\pm$  SEM for  $n = 3$  independent experiments. Difference in % Form II DNA for [30  $\mu\text{M}$  piperidine – 0  $\mu\text{M}$  piperidine] significantly different than 0 by Student's t-test ( $*p < 0.05$ ).
